# Supplementary material
Source: PubMed Central journal article supplement (PMC11028645)
Supplement: 262_2013_1488_MOESM1_ESM.pdf [file 262_2013_1488_MOESM1_ESM.pdf]

## Online Resource 1

Peptides used for ELIspot assays.

### a) E6

| <i>Sequence</i>  | <i>Residues</i> |
|------------------|-----------------|
| MHQKRTAMFQDPQER  | 1-15            |
| AMFQDPQERPRKLPQ  | 7-21            |
| QERPRKLPQLCTELQ  | 13-27           |
| LPQLCTELQTTIHDI  | 19-33           |
| ELQTTIHDIILECVY  | 25-39           |
| HDIILECVYCKQQLL  | 31-45           |
| CVYCKQQLLRREVYD  | 37-51           |
| QLLRREVYDFAFRDL  | 43-57           |
| VYDFAFRDLCIVYRD  | 49-63           |
| RDLCIVYRDGNPYAV  | 55-69           |
| YRDGNPYAVCDKCLK  | 61-75           |
| YAVCDKCLKFYISKIS | 67-81           |
| CLKFYISKISEYRHYC | 73-87           |
| KISEYRHYCYSLYGT  | 79-93           |
| HYCYSLYGTTLEQQY  | 85-99           |
| YGTTLEQQYNKPLCD  | 91-105          |
| QQYNKPLCDLLIRCI  | 97-111          |
| LCDLLIRCINCQKPL  | 103-117         |
| RCINCQKPLCPEEKQ  | 109-123         |
| KPLCPEEKQRHLDKK  | 115-129         |
| EKQRHLDKKQRFHNI  | 121-135         |
| DKKQRFHNIIRGRWTG | 127-141         |
| HNIRGRWTGRCMSCC  | 133-147         |
| WTGRCMSCCRSSRTR  | 139-153         |
| SCCRSSRTRRETQL   | 145-158         |

### b) E7

| <i>Sequence</i> | <i>Residues</i> |
|-----------------|-----------------|
| MHGDTPTLHEYMLDL | 1-15            |
| TLHEYMLDLQPETTD | 7-21            |
| LDLQPETTDLYCYEQ | 13-27           |
| TTDLYCYEQLNDSSE | 19-33           |
| YEQLNDSSEEEDEID | 25-39           |
| SSEEEDEIDGPAGQA | 31-45           |
| EIDGPAGQAEPDRAH | 37-51           |
| GQAEPDRAHYNIVTF | 43-57           |
| RAHYNIVTFCKCDS  | 49-63           |
| VTFCKCDSTLRLCV  | 55-69           |
| CDSTLRLCVQSTHVD | 61-75           |
| LCVQSTHVDIRTLED | 67-81           |
| HVDIRTLEDLLMGTL | 73-87           |
| LEDLLMGTLGIVCPI | 79-93           |
| GTLGIVCPICSQKP  | 85-98           |

## c) PPP

| <i>Sequence</i>       | <i>Pathogen and Protein</i> | <i>Residue</i> |
|-----------------------|-----------------------------|----------------|
| PKYVKQNTLKLAT         | Influenza A HA              | 306-324        |
| QYIKANSKFIGITEL       | TETANUS                     | 830-844        |
| FNNFTVSFWLRVPKVSASHLE | TETANUS                     | 947-967        |
| TSLYNLRRGTALA         | EBNA1                       | 515-527        |
| AGLTLSLLVICSYLFISRG   | EBV BHRF1                   | 171-181        |
| IVTDFSVIKAIEEEE       | EBV EBNA3c                  | 416-429        |
| LTKGILGFVFTLTVPSERG   | Flu M1                      | 55-73          |
| IQNAGLCTLVAMLEE       | EBV lytic                   | 276-290        |
| RPFFHPVGEADYFEY       | EBNA1                       | 403-417        |
| QEFFWDANDIYRIFA       | HCMVpp65                    | 511-525        |
| QTEENLLDFVRFMGV       | EBNA3c                      | 281-290        |
| RKTPRVTTGGGAMAGA      | CMVpp65                     | 415-429        |
| RPQKRPSICGCKGT        | EBNA1                       | 71-85          |
| RKCRAKFQLLQHYR        | BZLF1                       | 187-201        |
| IQMCTELKLSDYEGR       | Flu NP                      | 41-55          |
| SALILRGSVAHKSCLE      | Flu NP                      | 265-273        |
| STLELRSRYWAIRTR       | Flu NP                      | 377-391        |
| AAFEDLRVLSFIKGTK      | Flu NP                      | 336-351        |

## Online Resource 2. Summary of ELISPOT Results.

| Patient | E6 Pre-therapy |      |                   |      | E6 Post-therapy |      |                   |      |
|---------|----------------|------|-------------------|------|-----------------|------|-------------------|------|
|         | Mean PBMC      | SD   | Mean PBMC+ E6 pep | SD   | Mean PBMC       | SD   | Mean PBMC+ E6 pep | SD   |
| 2       | 18.0           | 2.8  | <b>46</b>         | 15.4 | 27              | 11   | <b>85</b>         | 25.3 |
| 3       | 90.7           | 4.8  | <b>134</b>        | 6.2  | 34              | 1    | <b>53</b>         | 16.6 |
| 4       | 102.0          | 11.9 | 94                | 13.5 | 78              | 17   | 44                | 11   |
| 5       | 154.0          | 4.1  | <b>207</b>        | 5.2  | 111             | 13.5 | 105               | 8    |
| 6       | 39.0           | 9.9  | 61                | 7.4  | 65              | 25   | 52                | 6.5  |
| 7       | 10.0           | 1.0  | <b>54</b>         | 13.8 | 27              | 12   | <b>89</b>         | 11.8 |
| 8       | 122.3          | 1.7  | 129               | 10.2 | 88              | 9.4  | 85                | 8.1  |
| 9       | 45.0           | 17.5 | <b>294</b>        | 21.1 | 31              | 5.1  | <b>335</b>        | 24.1 |
| 16      | 79.0           | 3.6  | <b>134</b>        | 4.9  | 17              | 1.7  | 27                | 1.2  |
| 17      | 25.0           | 4.2  | <b>73</b>         | 13.7 | 15              | 3.4  | 31                | 5    |
| 18      | 14.3           | 3.8  | <b>74</b>         | 7.4  | 5               | 1    | 8                 | 2    |
| 19      | 38.0           | 4.0  | <b>75</b>         | 5.6  | 35              | 2.5  | 31                | 0.5  |
| 20      | 107.7          | 5.6  | <b>155</b>        | 6.6  | 67              | 11.4 | 95                | 6.2  |

Resp 10/13

% Resp 76.92

Resp 4/13

% Resp 30.77

| Patient | E7 Pre-therapy |      |                   |      | E7 Post-therapy |      |                   |      |
|---------|----------------|------|-------------------|------|-----------------|------|-------------------|------|
|         | Mean PBMC      | SD   | Mean PBMC+ E7 pep | SD   | Mean PBMC       | SD   | Mean PBMC+ E7 pep | SD   |
| 2       | 19             | 2.6  | <b>256</b>        | 58   | 62              | 0.5  | 52                | 4.5  |
| 3       | 94             | 19.9 | 101               | 28.4 | 52              | 6.5  | 53                | 4.5  |
| 4       | 206            | 1.2  | <b>285</b>        | 10.1 | 116             | 4.5  | 104               | 15.4 |
| 5       | 178            | 18.4 | <b>241</b>        | 4.1  | 169             | 14.6 | 183               | 9.9  |
| 6       | 104            | 5.9  | <b>168</b>        | 4.5  | 50              | 5    | 60                | 8.2  |
| 7       | 171            | 0.5  | 153               | 12.8 | 126             | 30.2 | 128               | 18.4 |
| 8       | 197            | 3.4  | 199               | 6    | 79              | 7.8  | <b>138</b>        | 23.4 |
| 9       | 137            | 18.4 | 144               | 1.6  | 97              | 0.5  | 103               | 12.6 |
| 16      | 77             | 11.7 | <b>119</b>        | 20.3 | 68              | 3.6  | <b>75</b>         | 4.2  |
| 17      | 62             | 5    | <b>113</b>        | 22.5 | 16              | 4    | 25                | 2.4  |
| 18      | 85             | 4.5  | <b>160</b>        | 10.9 | 5               | 0    | 10                | 5    |
| 19      | 43             | 5    | 56                | 2    | 43              | 1    | 75                | 1.5  |
| 20      | 123            | 5.3  | <b>177</b>        | 10.3 | 91              | 5.7  | 81                | 5.2  |

Resp 8/13

% Resp 61.54

Resp 2/13

% Resp 15.38

| Patient | PPP Pre-therapy |      |                    |      | PPP Post-therapy |      |                    |      |
|---------|-----------------|------|--------------------|------|------------------|------|--------------------|------|
|         | Mean PBMC       | SD   | Mean PBMC+ PPP pep | SD   | Mean PBMC        | SD   | Mean PBMC+ PPP pep | SD   |
| 2       | 176             | 34.5 | <b>288</b>         | 11   | 74               | 5.5  | <b>100</b>         | 13.7 |
| 3       | 43              | 9.9  | <b>158</b>         | 16.4 | 59               | 4    | <b>99</b>          | 12.3 |
| 4       | 191             | 21.6 | 239                | 11.5 | 159              | 1    | <b>205</b>         | 20.2 |
| 5       | 173             | 3.4  | <b>252</b>         | 9.3  | 138              | 10.2 | 129                | 8.3  |
| 6       | 180             | 24.6 | 237                | 4.3  | 49               | 0.5  | 61                 | 5.4  |
| 7       | 155             | 2    | <b>326</b>         | 13.3 | 55               | 8.5  | <b>366</b>         | 5.2  |
| 8       | 196             | 11.3 | <b>311</b>         | 14.6 | 68               | 8.2  | <b>121</b>         | 10.6 |
| 9       | 136             | 13.1 | <b>420</b>         | 9.4  | 110              | 10.9 | <b>424</b>         | 21.6 |
| 16      | 149             | 13.9 | <b>286</b>         | 15.5 | 65               | 6.1  | <b>190</b>         | 2.2  |
| 17      | 156             | 7.8  | <b>234</b>         | 8.1  | 57               | 7.8  | <b>182</b>         | 31.6 |
| 18      | 48              | 7.3  | <b>112</b>         | 15.9 | 6                | 1    | <b>37</b>          | 13.7 |
| 19      | 70              | 12.5 | <b>202</b>         | 2.9  | 55               | 0    | <b>156</b>         | 10.5 |
| 20      | 54              | 7.6  | <b>323</b>         | 9    | 154              | 10.5 | <b>272</b>         | 33   |

Resp 11/13

% Resp 84.62

Resp 11/13

% Resp 84.62

Mean spot counts were determined by AID plate reader. Results in bold, signify positive responses according to the criteria described in Materials and Methods. Results in italics denotes use of duplicate rather than triplicate wells due to insufficient cell recovery from cultures.

### Online Resource 3. Representative ELISPOT Responses.

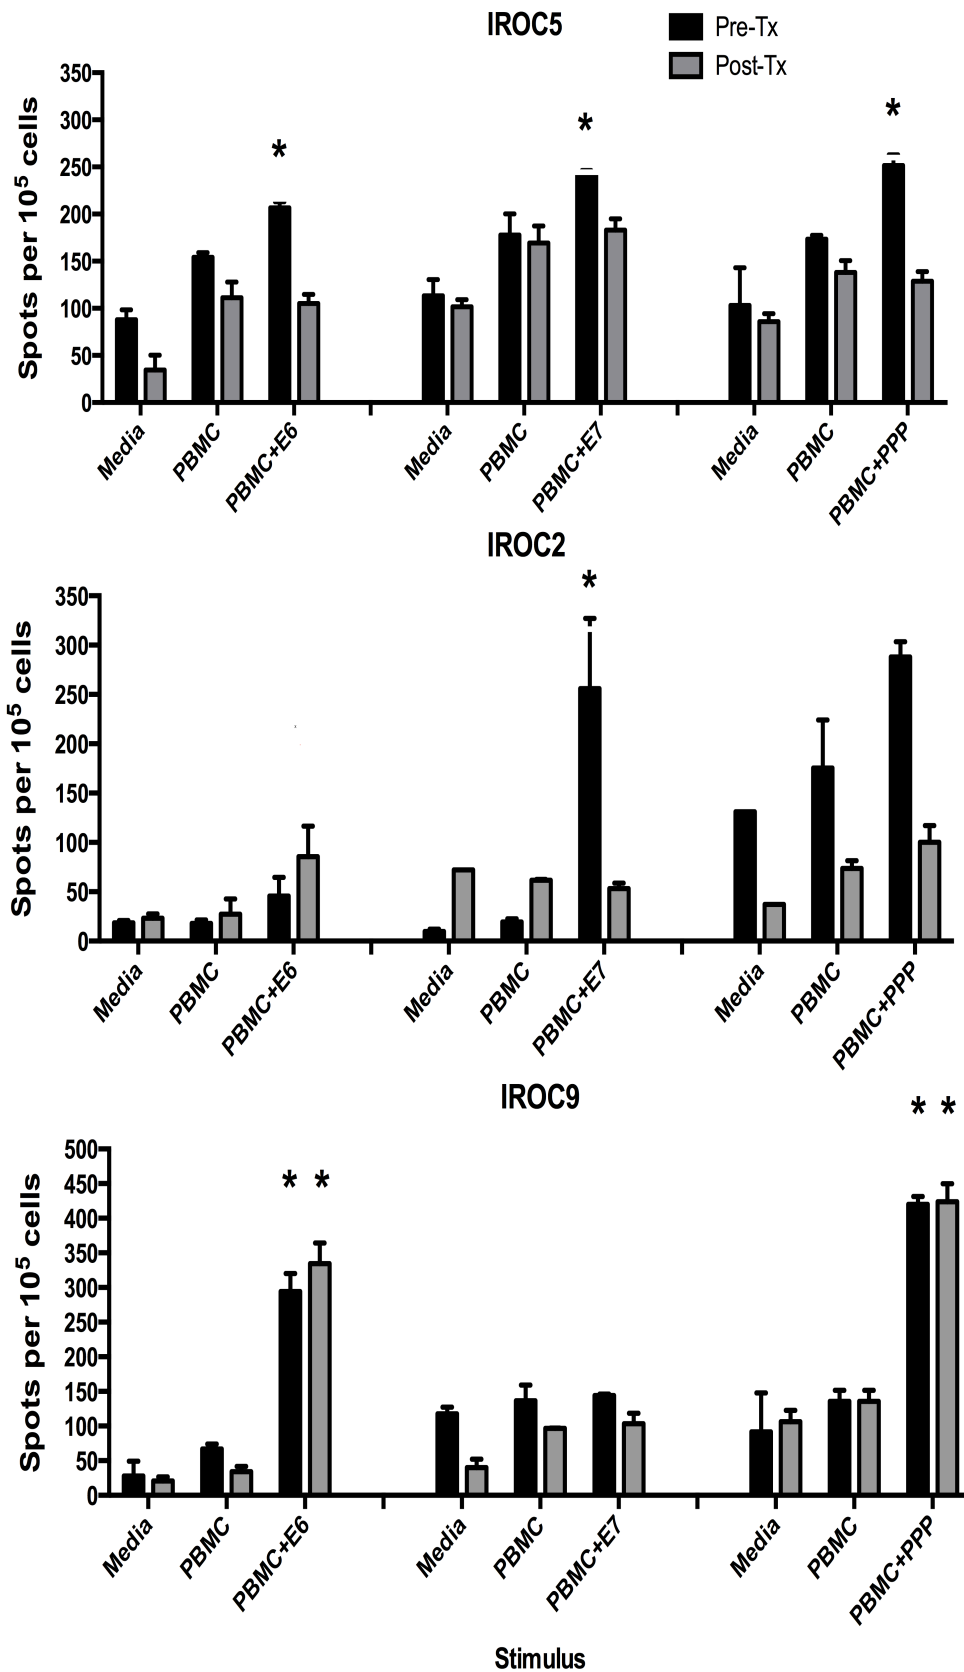

Fig S1. HPV16 peptide specific T cell responses in patients with oropharyngeal cancer. PBMC taken before (pre-Tx) and after therapy (post-Tx) were cultured with E6, E7 or PPP (recall) peptides then tested in IFN $\gamma$  ELISPOT assays against Media, PBMC, or PBMC+peptide. Representative graphs for patients with decreased responses post-therapy (IROC 5 and 2) or unchanged responses (IROC9). Graphs show mean spot counts. with \* denoting positive responses.

## Online Resource 4. Summary of Patient Details, Immune Cell Parameters and Clinical Follow-up

| <i>Patient / Tumour details</i> |                                     |             |                 | <i>Immune cell parameters</i> |                          |                         |                          | <i>Treatment details</i> |                      |                          |                                      | <i>Followup status (August 2013)</i> |                                   |                    |                     |                     |                                       |                                     |
|---------------------------------|-------------------------------------|-------------|-----------------|-------------------------------|--------------------------|-------------------------|--------------------------|--------------------------|----------------------|--------------------------|--------------------------------------|--------------------------------------|-----------------------------------|--------------------|---------------------|---------------------|---------------------------------------|-------------------------------------|
| <i>Study number</i>             | <i>Pre-treatment TNM stage Site</i> |             | <i>HPV type</i> | <i>ELISPOT E6 preTx</i>       | <i>ELISPOT E6 postTx</i> | <i>ELISPOT E7 preTx</i> | <i>ELISPOT E7 postTx</i> | <i>Increase Tregs</i>    | <i>Increase MDSC</i> | <i>Neoadjuvant chemo</i> | <i>Definitive Platinum based CRT</i> | <i>RT + Concurrent Cetuximab</i>     | <i>Primary Surgery Post-op RT</i> | <i>Progression</i> | <i>Disease free</i> | <i>Alive / Dead</i> | <i>Duration of follow up (months)</i> | <i>Time to progression (months)</i> |
|                                 | IROC02                              | T2N2c       |                 |                               |                          |                         |                          |                          |                      |                          |                                      |                                      |                                   |                    |                     |                     |                                       |                                     |
| IROC03                          | T2N2b                               | tongue base | HPV16           | +                             | +                        | -                       | -                        | -                        | +                    | PF                       | 0                                    | 1                                    | 0                                 | 0                  | 1                   | A                   | 17.7                                  |                                     |
| IROC04                          | T4aN2c                              | tongue base | HPV16           | -                             | -                        | +                       | -                        | +                        | +                    | TPF                      | 1                                    | 0                                    | 0                                 | 1 (lung)           | 0                   | A                   | 23.8                                  | 21.0                                |
| IROC05                          | T4aN0                               | tongue base | HPV16           | +                             | -                        | +                       | -                        | +                        | +                    | TPF                      | 1                                    | 0                                    | 0                                 | 0                  | 1                   | A                   | 20.4                                  |                                     |
| IROC06                          | T2N2b                               | tonsil      | HPV16           | -                             | -                        | +                       | -                        | +                        | +                    | 0                        | 0                                    | 0                                    | 1                                 | 0                  | 1                   | A                   | 20.7                                  |                                     |
| IROC07                          | T4aN2a                              | tongue base | Not tested      | +                             | +                        | -                       | -                        | +                        | -                    | 0                        | 1                                    | 0                                    | 0                                 | 0                  | 1                   | A                   | 10.5                                  |                                     |
| IROC08                          | T2N2b                               | tonsil      | HPV16           | -                             | -                        | -                       | +                        | +                        | +                    | 0                        | 0                                    | 0                                    | 1                                 | 0                  | 1                   | A                   | 15.2                                  |                                     |
| IROC09                          | T4bN2c                              | tonsil      | HPV16           | +                             | +                        | -                       | -                        | +                        | +                    | TPF                      | 1                                    | 0                                    | 0                                 | 0                  | 1                   | A                   | 19.0                                  |                                     |
| IROC16                          | T2N2b                               | tonsil      | no HPV          | +                             | -                        | +                       | +                        | +                        | -                    | TPF                      | 1                                    | 0                                    | 0                                 | 0                  | 1                   | A                   | 8.4                                   |                                     |
| IROC17                          | T2N2c                               | tonsil      | no HPV          | +                             | -                        | +                       | -                        | +                        | +                    | PF                       | 0                                    | 1                                    | 0                                 | 1 (local)          | 0                   | D                   | 5.7                                   | 4.8                                 |
| IROC18                          | T4bN2c                              | tonsil      | no HPV          | +                             | -                        | +                       | -                        | +                        | +                    | TPF                      | 1                                    | 0                                    | 0                                 | 0                  | 1                   | A                   | 12.9                                  |                                     |
| IROC19                          | T2N2b                               | tonsil      | HPV16           | +                             | -                        | -                       | -                        | +                        | +                    | TPF                      | 0                                    | 1                                    | 0                                 | 0                  | 1                   | A                   | 10.1                                  |                                     |
| IROC20                          | T1N2b                               | tongue base | HPV16           | +                             | -                        | +                       | -                        | +                        | +                    | 0                        | 1                                    | 0                                    | 0                                 | 0                  | 1                   | A                   | 15.1                                  |                                     |

Study number (IROC#) corresponds to patient number in Results section

Elispot responses; +=significant response, -=no response

Increase in phenotypic markers; += increase, -= no increase, ND=not done, insufficient sample for phenotypic analysis

Abbreviations: TPF= chemotherapy with docetaxel (T), cisplatin (P) and 5 Fluorouracil (F), CRT = concurrent platinum based chemotherapy and radiotherapy
